# Supplementary material
Source: PubMed Central journal article supplement (PMC3463825)
Supplement: supp_112.046417_Correction_to_DMD-46417-v2.pdf [file supp_112.046417_Correction_to_DMD-46417-v2.pdf]

**Correction to “In Vivo-Formed versus Preformed Metabolite Kinetics of *trans*-Resveratrol-3-sulfate and *trans*-Resveratrol-3-glucuronide”**

In the article referenced above [Sharan S, Iwuchukwu OF, Canney DJ, Zimmerman CL, and Nagar S (2012) *Drug Metab Dispos* **40**:1993-2001; doi:10.1124/dmd.112.046417], errors were introduced to equations (1)-(3) after the authors corrected the page proofs. “RES” instead of “R3S” or “R3G” was used as a superscript in four places. The corrected equations are:

$$f_{m_{R3S}} = \left[ \frac{(AUC_{R3S}^{RES})}{(AUC_{R3S})} \right] \times \left[ \frac{Dose_{R3S}}{Dose_{RES}} \right] \times \left[ \frac{Cl_{R3S}^{RES}}{Cl_{R3S}} \right] \quad (1)$$

$$f_{m_{R3G}} = \left[ \frac{(AUC_{R3G}^{RES})}{(AUC_{R3G})} \right] \times \left[ \frac{Dose_{R3G}}{Dose_{RES}} \right] \times \left[ \frac{Cl_{R3G}^{RES}}{Cl_{R3G}} \right] \quad (2)$$

$$f_{m_{R3S}} = \left[ \frac{(AUC_{R3S}^{RES})}{(AUC_{R3S})} \right] \times \left[ \frac{Dose_{R3S}}{Dose_{RES}} \right] \quad (3)$$

The PDF and XML versions of this article will be corrected in the near future.

The compositor apologizes for any confusion and inconvenience caused by these errors.
